# Supplementary material
Source: PubMed Central journal article supplement (PMC7387204)

IL5RA Counts

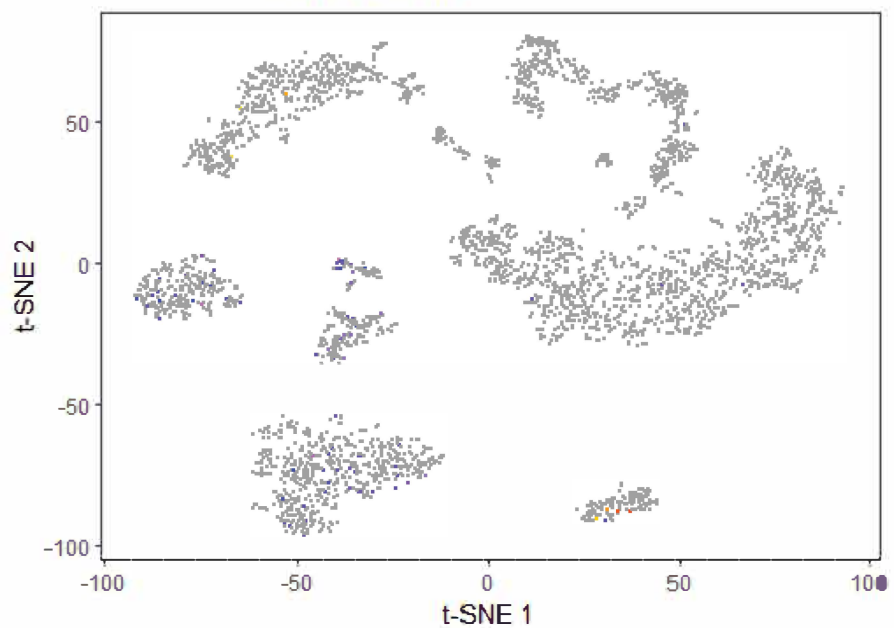

FOXJ1 Counts

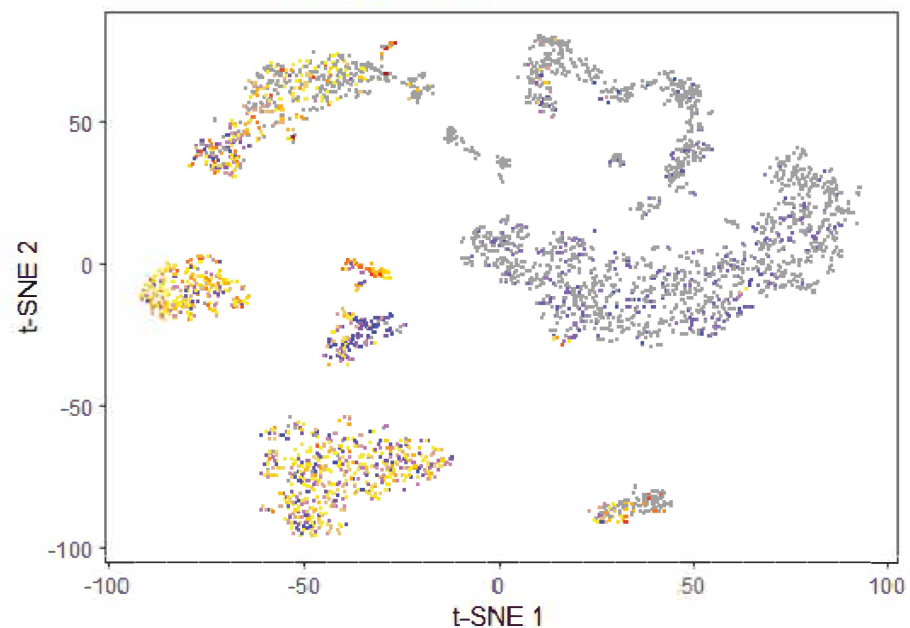

Supplement: NIHMS1589522-supplement-Supp_figS1.pdf [file NIHMS1589522-supplement-Supp_figS1.pdf]

**Figure S2**

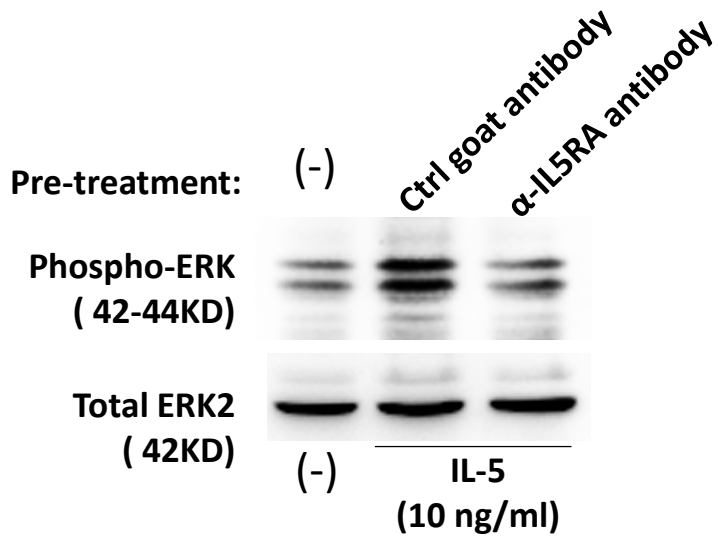

Supplement: NIHMS1589522-supplement-Supp_figS2.pdf [file NIHMS1589522-supplement-Supp_figS2.pdf]
